# Supplementary material for: Modifiable risk factors for 9-year mortality in older English and Brazilian adults: The ELSA and SIGa-Bagé ageing cohorts
Source: PubMed Central journal article supplement (PMC7062886; doi:10.1038/s41598-020-61127-7), 2020-03-09
Supplement: 41598_2020_61127_MOESM1_ESM.pdf [file 41598_2020_61127_MOESM1_ESM.pdf]

## Modifiable risk factors for 9-year mortality in older English and Brazilian adults: The ELSA and SIGa-Bagé ageing cohorts

Marciane Kessler<sup>1,2\*</sup>, Elaine Thumé<sup>1</sup>, Shaun Scholes<sup>2</sup>, Michael Marmot<sup>2</sup>, Luiz Augusto Facchini<sup>1,3</sup>, Bruno Pereira Nunes<sup>1</sup>, Karla Pereira Machado<sup>1</sup>, Mariangela Uhlmann Soares<sup>1</sup>, Cesar de Oliveira<sup>2</sup>

**Supplementary Table 1.** Population attributable fractions (PAF) for 9-year mortality by selected baseline risk factors (The ELSA and SIGa-Bagé cohort studies)

|                  | Model 1 <sup>a</sup> |        | Model 2 <sup>b</sup> |        | Model 3 <sup>c</sup> |        |
|------------------|----------------------|--------|----------------------|--------|----------------------|--------|
|                  | PAF % (95 CI)        | P      | PAF % (95 CI)        | P      | PAF % (95 CI)        | P      |
| <b>ELSA</b>      |                      |        |                      |        |                      |        |
| Smoking          | 6.3 (3.6, 8.8)       | <0.001 | 5.2 (3.4, 7.0)       | <0.001 | 4.9 (3.0, 6.8)       | <0.001 |
| Hypertension     | 8.8 (-3.4, 19.6)     | 0.152  | 3.6 (-9.5, 15.2)     | 0.576  | 2.8 (-10.5, 14.5)    | 0.664  |
| Diabetes         | 4.7 (1.7, 7.5)       | 0.002  | 3.6 (0.8, 6.2)       | 0.010  | 3.3 (0.6, 6.0)       | 0.017  |
| Obesity          | 5.6 (1.1, 9.8)       | 0.015  | 3.2 (-1.3, 7.5)      | 0.161  | 2.5 (-2.2, 7.0)      | 0.298  |
| Inactivity       | 18.9 (14.0, 23.5)    | <0.001 | 17.0 (13.2, 20.7)    | <0.001 | 16.5 (12.5, 20.3)    | <0.001 |
| Combined*        | -                    | -      | 28.9 (18.3, 38.1)    | <0.001 | 26.9 (15.8, 36.6)    | <0.001 |
| <b>SIGa-Bagé</b> |                      |        |                      |        |                      |        |
|                  | PAF % (95 CI)        | P      | PAF % (95 CI)        | P      | PAF % (95 CI)        | P      |
| Smoking          | 4.7 (1.4, 7.8)       | 0.005  | 4.6 (1.0, 8.1)       | 0.011  | 4.9 (1.3; 8.3)       | 0.008  |
| Hypertension     | 4.9 (-3.6, 12.8)     | 0.248  | 9.1 (-0.3, 17.7)     | 0.058  | 8.6 (-0.9; 17.3)     | 0.075  |
| Diabetes         | 2.6 (-0.6, 5.7)      | 0.110  | 3.0 (-0.4, 6.4)      | 0.086  | 2.9 (-0.5; 6.3)      | 0.098  |
| Obesity          | 0.9 (-2.6, 4.4)      | 0.597  | 0.6 (-3.0, 4.1)      | 0.725  | 0.7 (-3.0; 4.3)      | 0.701  |
| Inactivity       | 20.5 (14.0, 26.5)    | <0.001 | 17.3 (9.9, 24.0)     | <0.001 | 16.7 (9.3; 23.5)     | <0.001 |
| Combined*        | -                    | -      | 30.9 (20.4, 39.9)    | <0.001 | 30.2 (19.6; 39.4)    | <0.001 |

PAF: Population Attributable Fraction;

<sup>a</sup> **Model 1** (age- and sex-adjusted); <sup>b</sup> **Model 2** (Model 1 + other risk factors); <sup>c</sup> **Model 3** (Model 2 + wealth as a categorical variable). For each risk factor, the PAF compares the “baseline” scenario (risk factor prevalence as observed) with a “fantasy” scenario where the prevalence of the risk factor in question was set to zero.

\*Combined PAF compares the “baseline” scenario (risk factor prevalence as observed) with a “fantasy” scenario where the prevalence of **each** risk factor was set to zero.

**Supplementary Table 2.** Mortality rates and hazard ratios by wealth for nine-year mortality among English and Brazilians by wealth (The ELSA and SIGa-Bagé cohort studies).

|                     | Deaths (rate per 1000 person years) |           | HR (95% CI) <sup>a</sup> |                  | Deaths (rate per 1000 person years) |            | HR (95% CI) <sup>a</sup> |                  |
|---------------------|-------------------------------------|-----------|--------------------------|------------------|-------------------------------------|------------|--------------------------|------------------|
|                     | ELSA                                | SIGa-Bagé | Age 60-74                |                  | Age 75+                             |            |                          |                  |
|                     | ELSA                                | SIGa-Bagé | ELSA                     | SIGa-Bagé        | ELSA                                | SIGa-Bagé  | ELSA                     | SIGa-Bagé        |
| <b>Wealth Men</b>   |                                     |           |                          |                  |                                     |            |                          |                  |
| Poorest             | 62 (26.7)                           | 55 (78.7) | <b>1.69 (1.15-2.48)</b>  | 1.28 (0.81-2.00) | 74 (85.5)                           | 44 (171.5) | 1.11 (0.79-1.55)         | 1.31 (0.77-2.25) |
| Middle              | 39 (22.2)                           | 52 (54.8) | <b>1.61 (1.07-2.42)</b>  | 1.01 (0.66-1.54) | 47 (81.4)                           | 45 (146.2) | 1.09 (0.76-1.56)         | 1.43 (0.83-2.45) |
| Richest             | 59 (12.5)                           | 44 (56.4) | 1.0                      | 1.0              | 85 (68.2)                           | 22 (104.6) | 1.0                      | 1.0              |
| Trend **            |                                     |           | <b>1.30 (1.08-1.56)</b>  | 1.13 (0.89-1.42) |                                     |            | 1.05 (0.89-1.25)         | 1.12 (0.87-1.45) |
| <b>Wealth Women</b> |                                     |           |                          |                  |                                     |            |                          |                  |
| Poorest             | 45 (14.2)                           | 60 (45.3) | 1.32 (0.82-2.11)         | 1.28 (0.79-2.06) | 82 (56.5)                           | 77 (101.0) | 1.00 (0.70-1.41)         | 0.71 (0.44-1.15) |
| Middle              | 23 (10.2)                           | 73 (48.2) | 1.28 (0.75-2.18)         | 1.49 (0.96-2.33) | 32 (34.8)                           | 86 (145.5) | 0.68 (0.44-1.03)         | 1.18 (0.73-1.89) |
| Richest             | 38 (7.6)                            | 34 (31.7) | 1.0                      | 1.0              | 72 (47.6)                           | 38 (122.1) | 1.0                      | 1.0              |
| Trend **            |                                     |           | 1.15 (0.91-1.44)         | 1.11 (0.89-1.38) |                                     |            | 1.00 (0.83-1.21)         | 0.81 (0.65-1.02) |

<sup>a</sup> Adjusted for age+ risk factors; \*\*Test for trend (wealth entered as a single continuous variable). Statistically significant coefficients shown in bold.
